# Supplementary material for: Agonist-selective recruitment of engineered protein probes and of GRK2 by opioid receptors in living cells
Source: eLife. 2020 Feb 25;9:e54208. doi: 10.7554/eLife.54208 (PMC7041944; doi:10.7554/eLife.54208)
Supplement: Figure 2—source data 1. [file elife-54208-fig2-data1.csv]

log[Agonist], M	ET miniGi (Fig 2C)	ET miniGi (Fig 2C)	ET miniGi (Fig 2C)	ET miniGi (Fig 2C)	ET miniGi (Fig 2C)	ET miniGi (Fig 2C)	ET Nb33 (Fig 2C)	ET Nb33 (Fig 2C)	ET Nb33 (Fig 2C)	ET Nb33 (Fig 2C)	ET Nb33 (Fig 2C)	ET Nb33 (Fig 2C)	TPD ET miniGi (Fig 2J)	TPD ET miniGi (Fig 2J)	TPD ET miniGi (Fig 2J)	TPD ET miniGi (Fig 2J)	TPD ET miniGi (Fig 2J)	TPD ET miniGi (Fig 2J)	TPD ET Nb33 (Fig 2J)	TPD ET Nb33 (Fig 2J)	TPD ET Nb33 (Fig 2J)	TPD ET Nb33 (Fig 2J)	TPD ET Nb33 (Fig 2J)	TPD ET Nb33 (Fig 2J)	Cmpd101 ET miniGi (Fig 2K)	Cmpd101 ET miniGi (Fig 2K)	Cmpd101 ET miniGi (Fig 2K)	Cmpd101 ET miniGi (Fig 2K)	Cmpd101 ET miniGi (Fig 2K)	Cmpd101 ET miniGi (Fig 2K)	Cmpd101 ET Nb33 (Fig 2K)	Cmpd101 ET Nb33 (Fig 2K)	Cmpd101 ET Nb33 (Fig 2K)	Cmpd101 ET Nb33 (Fig 2K)	Cmpd101 ET Nb33 (Fig 2K)	Cmpd101 ET Nb33 (Fig 2K)
	1	2	3	4	5	6	1	2	3	4	5	6	1	2	3	4	5	6	1	2	3	4	5	6	1	2	3	4	5	6	1	2	3	4	5	6
-11.00	0.00000000	0.00000000	0.00000000	0.00000000	0.00000000	0.00000000	0.000000000	0.000000000	0.000000000	0.000000000	0.000000000		0.00000000	0.00000000	0.00000000	0.00000000	0.00000000					0.000000000	0.000000000		0.00000000	0.00000000	0.00000000				0.000000000	0.000000000	0.000000000
-10.00	0.03924565	0.01354564	0.06901952	0.00129581	0.02596821	0.01235444	0.029045990	-0.027378800	0.010396860	0.030037290	0.060229970		0.00000000	0.00000000	0.00000000	0.00000000	0.00000000		0.000000000	0.000000000	0.000000000	0.000000000	0.000000000		0.00000000	0.00000000	0.00000000				0.000000000	0.000000000	0.000000000
-9.00	0.45234200	0.44265676	0.33822451	0.06111477	0.27781446	0.12783608	0.007387610	0.017810750	0.024886990	0.049872330	-0.016245500		0.01138445	0.02802363	0.13621496	0.07123780	0.37994271		-0.014463900	0.020325630	0.032968910	-0.066886700	-0.081212000		0.06444190	0.32236262	0.27154594				-0.009898700	0.056206910	0.003993840
-8.00	0.67530993	0.59830161	0.40071647	0.72759200	0.71368601	0.59651715	-0.018962500	-0.030941000	0.143461270	0.134525280	-0.040974700		0.14994367	0.31496124	0.27945101	0.51015510	0.60786553		-0.001389400	0.042450250	0.047494490	0.024869550	-0.064291100		0.07692514	0.35954470	0.41753302				-0.012706600	0.074595410	-0.004436200
-7.00	0.66065690	0.63572023	0.63276250	0.72899857	0.66170686	0.66906871	-0.038124400	-0.021621000	0.157142260	0.162966140	0.124611090		0.32124578	0.45612354	0.37025005	0.57578207	0.68184999		0.001034380	0.090961150	0.166157400	0.044635930	0.001083510		0.55898737	0.58773122	0.45380039				0.121893650	0.096116880	-0.023161200
-6.00	0.65228882	0.64566946	0.64328460	0.65114144	0.71462099	0.68960154	-0.038251400	-0.109476800	0.159421360	0.163923760	0.138164510		0.34901688	0.70411454	0.40411085	0.63566914	0.69826557		0.008808500	0.183186210	0.113123500	0.087795640	-0.004486900		0.60421756	0.54689814	0.63510620				0.148004330	0.145161110	0.104408370
-5.00	0.66128546	0.67545685	0.65312546	0.64568211	0.68452330	0.67992010	0.026282380	-0.130849900	0.147235420	0.139220660	0.057896541				0.54282130	0.65428213	0.70073352				0.051236580	0.101116460	-0.009939300		0.65082347	0.58773122	0.62165279				0.174163150	0.145161110	0.082752350
