# Supplementary material for: Agonist-selective recruitment of engineered protein probes and of GRK2 by opioid receptors in living cells
Source: eLife. 2020 Feb 25;9:e54208. doi: 10.7554/eLife.54208 (PMC7041944; doi:10.7554/eLife.54208)
Supplement: Figure 3—source data 1. [file elife-54208-fig3-data1.csv]

log[Agonist], M	DAMGO miniGsi	DAMGO miniGsi	DAMGO miniGsi	DAMGO miniGsi	DAMGO miniGsi	DAMGO Nb33	DAMGO Nb33	DAMGO Nb33	DAMGO Nb33	DAMGO Nb33	ET miniGsi	ET miniGsi	ET miniGsi	ET miniGsi	ET miniGsi	ET Nb33	ET Nb33	ET Nb33	ET Nb33	ET Nb33	MS miniGsi	MS miniGsi	MS miniGsi	MS miniGsi	MS miniGsi	MS Nb33	MS Nb33	MS Nb33	MS Nb33	MS Nb33	PZM21 miniGsi	PZM21 miniGsi	PZM21 miniGsi	PZM21 miniGsi	PZM21 miniGsi	PZM21 Nb33	PZM21 Nb33	PZM21 Nb33	PZM21 Nb33	PZM21 Nb33
	1	2	3	4	5	1	2	3	4	5	1	2	3	4	5	1	2	3	4	5	1	2	3	4	5	1	2	3	4	5	1	2	3	4	5	1	2	3	4	5
-10	0.000000000	0.000000000	0.000000000			0.00000000	0.00000000	0.00000000			0.000000000	0.000000000	0.000000000	0.000000000		0.00000000	0.00000000	0.00000000	0.00000000		0.000000000	0.000000000	0.000000000	0.000000000	0.00000000	0.00000000	0.00000000	0.00000000	0.00000000		0.00000000	0.00000000	0.00000000	0.00000000	0.00000000	0.000000000	0.000000000	0.000000000	0.000000000	0.000000000
-9	0.485182510	0.452432660	0.449676900			0.08281097	0.07877115	0.09971006			0.115897290	0.307857900	0.748387900	0.673411650		0.01693919	0.02723818	0.63837790	0.36185959		0.485647570	0.525287750	0.533104080	0.526959660	0.36668167	0.08351591	0.09957466	0.07701382	0.12373415		0.34012546	0.28685153	0.37082650	0.31811573	0.29028892	0.044029900	0.063608770	0.022722750	0.028366410	0.064012470
-8	0.809671810	0.772897830	0.799687000			0.41365195	0.40252388	0.45480838			0.730259170	1.101094280	1.022880320	0.895995040		0.61728255	1.01613426	1.03944028	0.84151822		0.621859170	0.672433270	0.676208460	0.627147980	0.43737388	0.18951265	0.17245861	0.16446256	0.20633531		0.61733785	0.64502506	0.69222539	0.58052042	0.51763437	0.164134960	0.200945750	0.134820410	0.125102210	0.215103850
-7	0.925724040	0.913242670	0.933611010			0.70330980	0.83881410	0.90425343			0.889069650	1.072853750	1.020239610	0.930894680		0.98520803	1.02291949	1.08521476	0.88703238		0.722553520	0.752325790	0.734210250	0.708028810	0.55672478	0.33362554	0.32510898	0.33712547	0.40381916		0.74954531	0.75387139	0.76992522	0.69975971	0.62454359	0.223469960	0.275317790	0.072531270	0.201277630	0.283382720
-6	1.005280450	0.993241970	0.999663960			0.92725289	0.99176297	0.97164964			1.010242410	1.031279010	1.052533560	0.989052040		0.93655023	1.02641204	1.11354327	0.98376765		0.696154440	0.773392170	0.745403400	0.762880780	0.66920166	0.38604640	0.37005590	0.35359998	0.46061217		0.78277065	0.61774600	0.60843261	0.69335905	0.63901984	0.222601680	0.280686830	0.106708020	0.277681470	0.361050930
-5	1.002649150	0.996051510	1.000000000			0.98320540	0.99906000	1.00000000			0.962720800	1.041818510	0.975409370	1.007009100		0.89019615	1.05416358	1.06407761	1.00026478		0.696154440	0.773392170	0.745403400	0.762880780	0.66920166	0.38604640	0.37005590	0.35359998	0.46061217		0.74931149	0.64256814	0.68808517	0.73339216	0.67726633	0.268708770	0.294516540	0.096465480	0.301541110	0.385480140
