# Supplementary material for: Agonist-selective recruitment of engineered protein probes and of GRK2 by opioid receptors in living cells
Source: eLife. 2020 Feb 25;9:e54208. doi: 10.7554/eLife.54208 (PMC7041944; doi:10.7554/eLife.54208)
Supplement: Figure 5—source data 2. [file elife-54208-fig5-data2.csv]

frame #	KOR wt - ET, DynA (Fig.5E)	KOR wt - ET, DynA (Fig.5E)	KOR wt - ET, DynA (Fig.5E)	KOR wt - ET, DynA (Fig.5E)	KOR wt - ET, DynA (Fig.5E)	KOR TPD - ET, DynA (Fig.5F)	KOR TPD - ET, DynA (Fig.5F)	KOR TPD - ET, DynA (Fig.5F)	KOR TPD - ET, DynA (Fig.5F)	KOR TPD - ET, DynA (Fig.5F)	GRK2ct - ET, DynA (Fig.5G)	GRK2ct - ET, DynA (Fig.5G)	GRK2ct - ET, DynA (Fig.5G)	GRK2ct - ET, DynA (Fig.5G)	GRK2ct - ET, DynA (Fig.5G)	PTX - ET, DynA (Fig.5H)	PTX - ET, DynA (Fig.5H)	PTX - ET, DynA (Fig.5H)	PTX - ET, DynA (Fig.5H)	PTX - ET, DynA (Fig.5H)
	1	2	3	4	5	1	2	3	4	5	1	2	3	4	5	1	2	3	4	5
1.00	0.98799357	0.99587533	0.99519291	0.99240285		0.99383059	0.98913286	0.99144986	0.99209622		1.00299279	0.99634299	0.98273925	0.98840475	0.98577726	0.98623618	0.97615907	0.99520401
2.00	0.97210734	0.99716892	1.00121904	0.99798494		1.00406611	0.98376219	1.00328035	0.99814258		0.98774175	0.99048081	0.99891103	0.99340744	1.00042629	0.98265326	0.97907884	1.01202066
3.00	1.00754567	1.00371143	0.99842428	0.99650107		1.00585778	0.99139517	1.00241407	0.99989298		1.00213719	1.01317620	1.00630671	1.00357297	1.00346572	1.00015292	0.98457126	1.00412723
4.00	1.01321086	0.99885399	0.99845154	1.01148427		1.00765040	1.01307314	1.00101468	0.99954023		1.00712827	1.01271218	1.01204302	1.01461484	1.01033073	1.00962101	0.99311732	1.00235899
5.00	1.01914255	1.00439033	1.00671222	1.00162687		1.00396315	1.01389032	1.00005598	1.00940609		1.00766872	1.02565102	1.01288277	1.02387878	1.01745962	1.00343092	0.99687065	1.00633943
6.00	1.02506617	1.00581449	1.01322902	1.00800569		1.01001755	1.00586198	1.01152302	1.00579079		1.00303048	1.02700815	1.00886072	1.02585265	1.02913905	0.99548132	1.00215095	0.98900372
7.00	1.01844349	1.01018837	1.00573061	1.01462317		1.00579326	1.00288434	1.01847677	1.00821775		1.00055820	1.04130985	1.01930098	1.03709650	1.03553836	1.00877651	1.00786107	0.99094595
8.00	1.04233049	1.00189202	1.01274492	1.02365146		1.23236977	1.23603144	1.27815657	1.32816420		1.02780362	1.44933881	1.08440162	1.24813710	1.21279971	1.01021646	1.03966793	1.00915791
9.00	1.01071213	1.00475825	1.01779835	1.02002282		1.22291955	1.27155230	1.24278357	1.33933534		1.19907056	1.40646579	1.16514209	1.25311458	1.29002773	1.02072591	1.05411294	1.02127456
10.00	1.34233422	1.40028358	1.31249447	1.31066489		1.20898656	1.20497384	1.24964504	1.33431304		1.35785909	1.40037504	1.17503369	1.23221266	1.27618931	1.01345933	1.06292263	1.00606383
11.00	1.40382975	1.38781809	1.30653177	1.30519246		1.19623970	1.25191731	1.23311261	1.34121764		1.33217457	1.38645201	1.16838637	1.21839555	1.26708232	1.02290791	1.07311446	1.00903000
12.00	1.40140177	1.37406704	1.28979250	1.29206641		1.19521730	1.24333803	1.24282700	1.34715410		1.31177806	1.37428998	1.15556990	1.20523971	1.24935621	1.00721313	1.07501745	1.01731907
13.00	1.39904583	1.35465426	1.28088992	1.28336757		1.19605917	1.21760659	1.23755533	1.35910723		1.29719916	1.36801590	1.15207445	1.19080701	1.24985396	1.01642753	1.07394367	1.01076631
14.00	1.44089621	1.33140374	1.26871404	1.28609538		1.18476232	1.19743509	1.24221301	1.38082846		1.30029564	1.36430485	1.15641287	1.18634141	1.24897105	1.00484062	1.06177611	0.99686434
15.00	1.43073913	1.34159060	1.25078958	1.21110872		1.19485846	1.23239018	1.24677231	1.39113176		1.28144944	1.31762511	1.16085098	1.18949514	1.24488402	1.01703591	1.05582411	0.99059370
16.00	1.44461474	1.32845919	1.25490539	1.20739081		1.18290663	1.23069445	1.24898681	1.39348157		1.27026251	1.33709123	1.17987160	1.19051794	1.25159519	1.01799921	1.04950509	0.99593257
17.00	1.43924934	1.32390043	1.23898463	1.20120825		1.18747916	1.19809951	1.24815866	1.38505303		1.25539806	1.30323290	1.18583818	1.18909308	1.24684052	1.01359472	1.04417892	0.98579995
18.00	1.42012107	1.32527785	1.21539488	1.18887787		1.18296876	1.20776865	1.25077529	1.38874420		1.24145493	1.30991485	1.19477857	1.18909308	1.24423715	1.02692040	1.04196851	0.99352749
19.00	1.43673156	1.30937816	1.20993148	1.20262569		1.17413599	1.22815587	1.24641795	1.38407644		1.24935759	1.27412995	1.18370199	1.15407653	1.23237615	1.01498978	1.04333089	0.99557424
20.00	1.41063850	1.30765624	1.19905920	1.20198268		1.17971346	1.22106942	1.23875005	1.38219247		1.24735964	1.26709282	1.17888365	1.15529004	1.23026987	1.01334127	1.04459865	0.99636620
21.00	1.43631871	1.30042542	1.19161855	1.19629024		1.17392214	1.23032956	1.25020650	1.36219834		1.24903500	1.26448110	1.18478176	1.14957974	1.22867055	1.02661646	1.04211553	0.99519254
22.00	1.42903767	1.29784546	1.18824549	1.19416030		1.16750830	1.22045312	1.26647658	1.37550690		1.23346821	1.28245089	1.18403564	1.16101599	1.21508466	1.02838694	1.04621120	0.99615669
23.00	1.44417089	1.27981630	1.18683232	1.20365870		1.16102418	1.22106942	1.28068091	1.37116859		1.22621777	1.25588061	1.17514309	1.15615671	1.21185894	0.99904082	1.04871440	0.99517389
24.00	1.42958458	1.29124829	1.18029428	1.18651317		1.16161016	1.23032956	1.28793203	1.36779920		1.21421839	1.24077231	1.17476223	1.15425804	1.20937189	1.01355813	1.04411538	0.98385503
25.00	1.44298403	1.27648154	1.16914248	1.18539196		1.15707290	1.22045312	1.29645169	1.35143458		1.21041023	1.24692493	1.17211545	1.16179699	1.20953584	1.00623251	1.04697081	0.97921032
26.00	1.44346504	1.28860322	1.16753427	1.18675816		1.15604787	1.22106942	1.28377608	1.35254180		1.20538409	1.23184642	1.16365211	1.15564371	1.20039586	1.00201610	1.05058991	0.98344815
27.00	1.41777643	1.27546240	1.17114241	1.17914861		1.14668994	1.23032956	1.29328296	1.34972986		1.19950773	1.20964198	1.15631213	1.16146745	1.20494930	0.99514981	1.04708596	0.98628034
28.00	1.48857104	1.52079093	1.45336127	1.24088612		1.14504753	1.22045312	1.30024309	1.35607279		1.19680199	1.21683321	1.14734179	1.16205794	1.20123689	1.00235712	1.04923108	0.98116896
29.00	1.68502373	1.57227813	1.46315145	1.35098065		1.13323231	1.23032956	1.30024309	1.37215849		1.23138955	1.32189013	1.15579541	1.26174697	1.21915033	1.00592491	1.04764151	0.96875760
30.00	1.88794533	1.60508701	1.45444661	1.38226202		1.19467686	1.31232515	1.43206426	1.44933252		1.22491118	1.30836638	1.13905339	1.23409367	1.22234343	1.10070441	1.12465024	1.01977405
31.00	1.97171071	1.59966585	1.44311236	1.38682798		1.21508040	1.40870655	1.46547967	1.53663277		1.21823217	1.29810285	1.12059287	1.23956916	1.23084680	1.10025313	1.12485236	1.01881441
32.00	2.01339441	1.62650662	1.45429880	1.38390199		1.21886929	1.45221405	1.46568732	1.62152999		1.21424233	1.29810285	1.10930282	1.23414421	1.23463423	1.10407217	1.12805373	1.05608827
33.00	2.06826047	1.62180799	1.42792418	1.37051302		1.21696409	1.47209645	1.45214339	1.67426206		1.10281551	1.21822242	1.10930282	1.22710911	1.22939886	1.07383521	1.12987689	1.07156942
34.00	2.08770080	1.64752156	1.43309106	1.36349569		1.21458886	1.50144108	1.46839420	1.71617458		1.19265191	1.21881649	1.09325079	1.22710911	1.24265593	1.09037986	1.14036436	1.08342059
35.00	2.08756351	1.62408777	1.42327083	1.38204850		1.21337761	1.49262963	1.46540543	1.74065633		1.20077440	1.23347050	1.10840927	1.22509794	1.23954140	1.08451005	1.14560450	1.09086826
36.00	2.12801028	1.64271728	1.41923274	1.37103284		1.21532283	1.50143386	1.45323334	1.74264943		1.21433370	1.22824306	1.11301120	1.23399771	1.23923974	1.11085454	1.15497098	1.08582792
37.00	2.09817447	1.65331386	1.41135585	1.38291106		1.22141479	1.50389786	1.47595136	1.76085350		1.21826190	1.23994394	1.12541929	1.24232966	1.23375114	1.10923115	1.16331223	1.09801493
38.00	2.14384320	1.66982711	1.41257839	1.38673222		1.21439551	1.51070443	1.49280109	1.78019550		1.22182174	1.20481898	1.12354093	1.24411500	1.23240762	1.12333304	1.17027428	1.11233457
39.00	2.14209070	1.67901296	1.40646004	1.38980765		1.22986990	1.52814007	1.49075488	1.78076344		1.23903639	1.24980303	1.13907179	1.25085108	1.23478658	1.13513974	1.17292245	1.11226511
40.00	2.15874738	1.69305614	1.41933782	1.39506144		1.22998612	1.54713270	1.48522439	1.79027643		1.23299611	1.23041596	1.14338406	1.24971773	1.23284376	1.12439050	1.18246192	1.13259395
41.00	2.17715624	1.67737762	1.41768777	1.39120272		1.23792283	1.51179388	1.49270134	1.78834141		1.22384758	1.23239523	1.15125177	1.24726199	1.23772113	1.12287639	1.18700898	1.14803060
42.00	2.14956201	1.68667027	1.41638499	1.39569857		1.23077801	1.53044929	1.50292331	1.80948601		1.22673171	1.24949253	1.15712492	1.24731139	1.23836075	1.12671788	1.19718514	1.14678029
43.00	2.19829868	1.68972598	1.40617161	1.38013070		1.23054884	1.57771113	1.50051215	1.80752885		1.22841918	1.24871973	1.15711258	1.25872914	1.24050868	1.13234010	1.20431897	1.15416209
44.00	2.19725655	1.70033921	1.41064315	1.37714729		1.23221141	1.56824769	1.51194241	1.82138591		1.21737999	1.24138127	1.14140122	1.25553233	1.23937813	1.13244426	1.21359783	1.16041026
45.00	2.19428101	1.72256954	1.39065272	1.37829539		1.22801422	1.57343111	1.50679438	1.82459716		1.21710976	1.23307694	1.13925099	1.24307868	1.23416883	1.12303227	1.21366397	1.17167224
46.00	2.21242950	1.70984545	1.38697783	1.39040293		1.22995283	1.57771113	1.50734824	1.83188969		1.23037042	1.23747257	1.13196514	1.24770298	1.23764981	1.12813563	1.20531892	1.17800898
47.00	2.22719800	1.72302807	1.37196014	1.37483621		1.23868325	1.56824769	1.50995782	1.81177248		1.22996429	1.25182469	1.12474038	1.25484815	1.23598729	1.12987611	1.20622716	1.17858602
48.00	2.24760616	1.71379525	1.38028974	1.36238585		1.23426900	1.57343111	1.52046181	1.82277563		1.20900661	1.24627644	1.11695938	1.25212860	1.23111529	1.11963718	1.20317011	1.16033068
						1.23627163	1.57771113	1.50603436	1.84152001		1.22135095	1.22160694	1.11133430	1.25727410	1.23745627	1.10538625	1.20194431	1.17027177
						1.23226227	1.56824769	1.51525826	1.84349609		1.22210946	1.24930463	1.11027279	1.24919285	1.24003294	1.13769837	1.19939989	1.17157873
